# Supplementary material for: Scalable Production of AAV Vectors in Orbitally Shaken HEK293 Cells
Source: PubMed Central journal article supplement (PMC6305802; doi:10.1016/j.omtm.2018.11.004), 2018-11-22

**OMTM, Volume 13**

## **Supplemental Information**

### **Scalable Production of AAV Vectors**

#### **in Orbitally Shaken HEK293 Cells**

**Daniel Blessing, Gabriel Vachey, Catherine Pythoud, Maria Rey, Vivianne Padrun, Florian M. Wurm, Bernard L. Schneider, and Nicole Déglon**

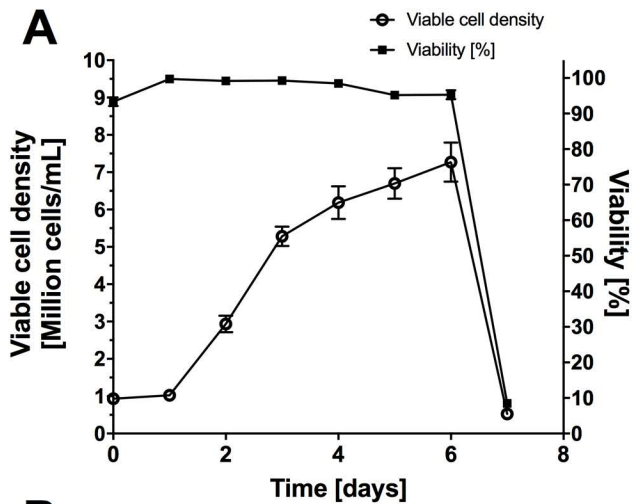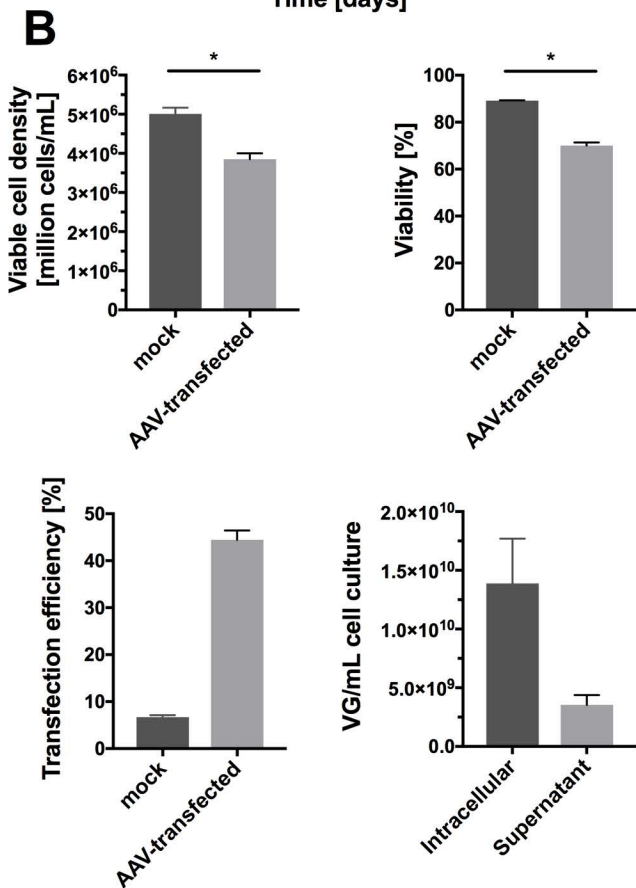

Supplement: mmc1.pdf [file mmc1.pdf]
